# Supplementary material for: Fe3O4nanoparticle decorated three-dimensional porous carbon/MoS2composites as anodes for high performance lithium-ion batteries
Source: Royal Society of Chemistry journal article supplement (doi:10.1039/c8nr10491c), 2019-01-01
Supplement: c8nr10491c1.pdf [file c8nr10491c1.pdf]

## Supporting Information

# **Fe<sub>3</sub>O<sub>4</sub> nanoparticles decorated three-dimensional porous carbon/MoS<sub>2</sub> composites as anodes for high performance lithium-ion batteries**

Youngmoo Jeon<sup>‡a</sup>, Jeongyeon Lee<sup>‡a</sup>, Myungjin Kim<sup>a</sup>, Jiseop Oh<sup>a</sup>, Taejin Hwang<sup>a</sup>, Yuanzhe Piao<sup>\*a, b</sup>

<sup>a</sup> Program in Nano Science and Technology, Graduate School of Convergence Science and Technology, Seoul National University, 145 Gwanggyo-ro, Yeongtong-gu, Suwon-si, Gyeonggi-do, 443-270, Republic of Korea.

<sup>b</sup> Advanced Institutes of Convergence Technology, 145 Gwanggyo-ro, Yeongtong-gu, Suwon-si, Gyeonggi-do, 443-270, Republic of Korea.

<sup>‡</sup> These authors contributed equally to this work.

Address correspondence to [parkat9@snu.ac.kr](mailto:parkat9@snu.ac.kr)

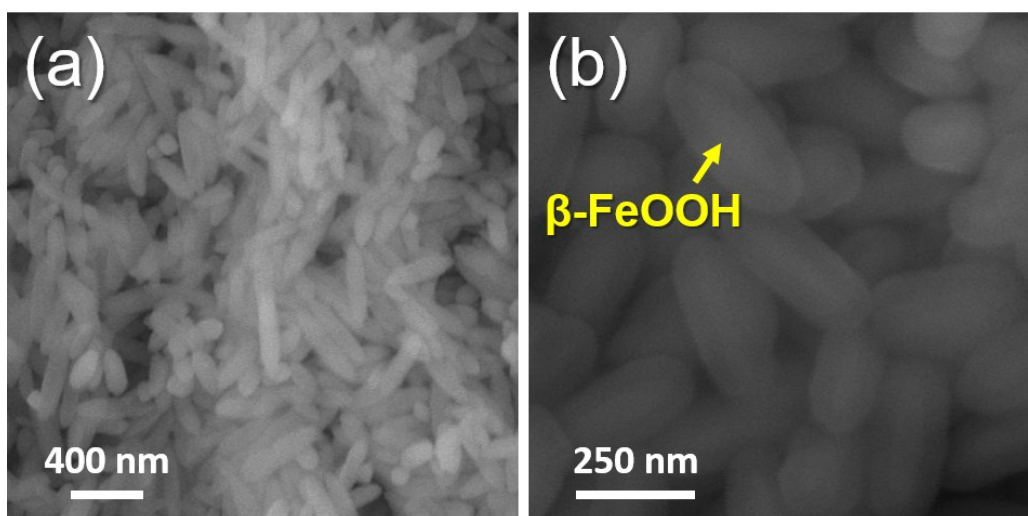

**Figure S1** SEM images of (a)  $\beta$ -FeOOH, and (b)  $\text{SiO}_2@\text{FeOOH}$ .

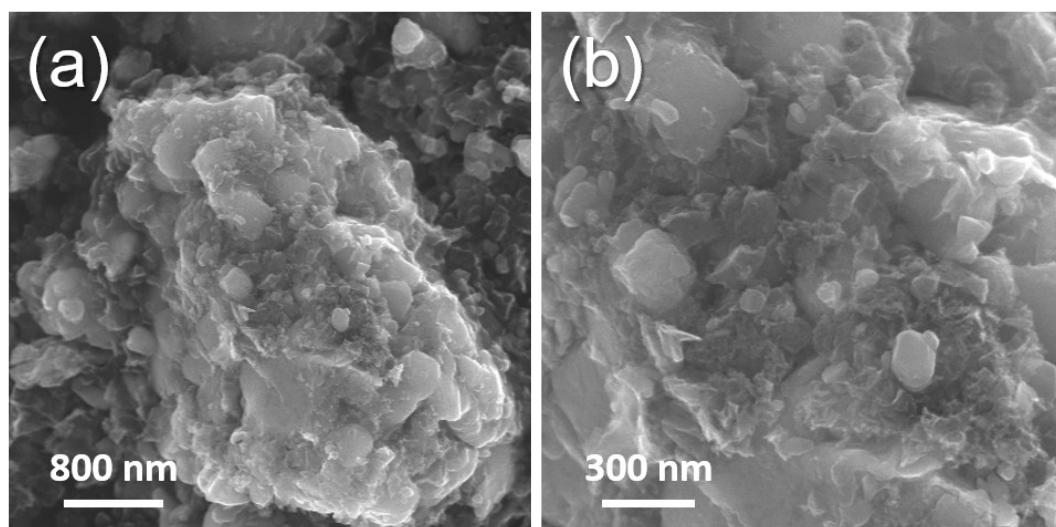

**Figure S2** SEM images of BC-MF at (a) low and (b) relatively high magnification.

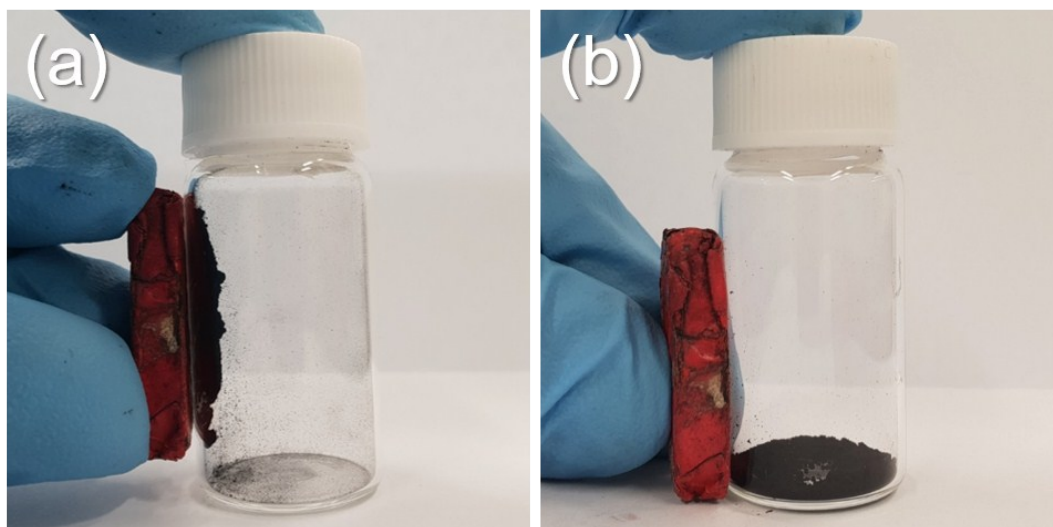

**Figure S3** Visual images of (a) C-MF and (b) C-M using an external magnet. The dragging of C-MF to the sidewall of the sample vial confirms the existence of  $\text{Fe}_3\text{O}_4$  in the sample. While in case of C-M, the etching process leads to the removal of  $\text{Fe}_3\text{O}_4$ .

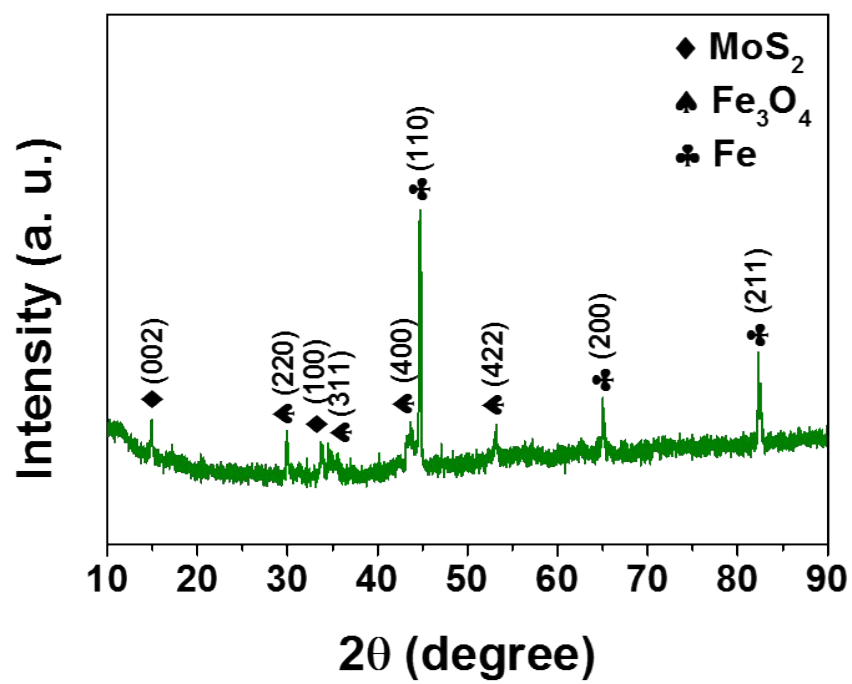

**Figure S4** XRD pattern of BC-MF.

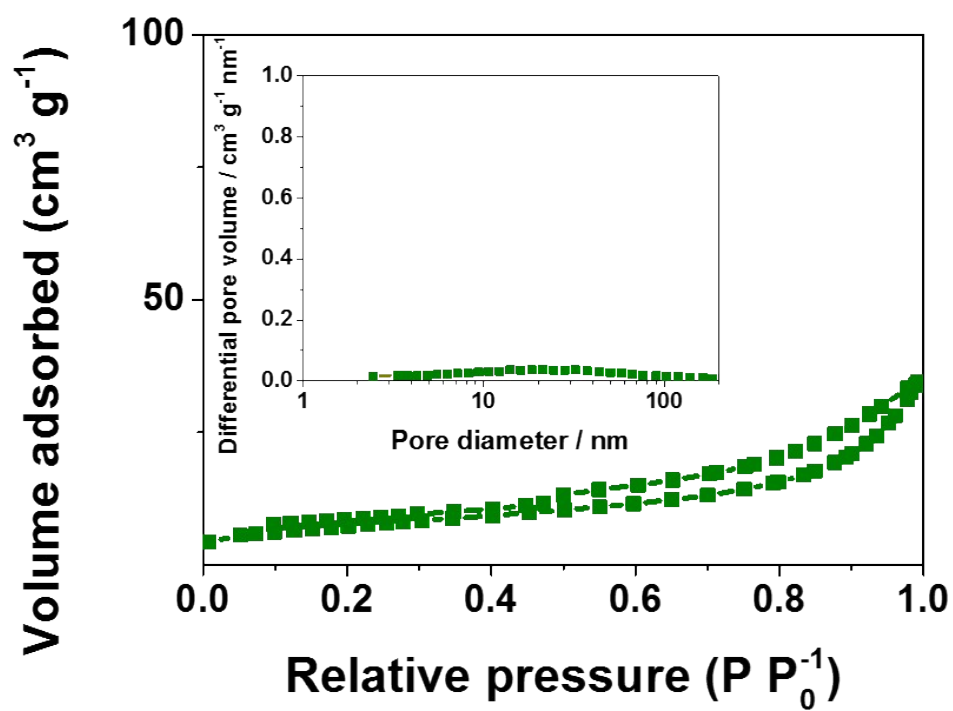

**Figure S5**  $\text{N}_2$  adsorption-desorption isotherms and pore size distribution (insert) of BC-MF.

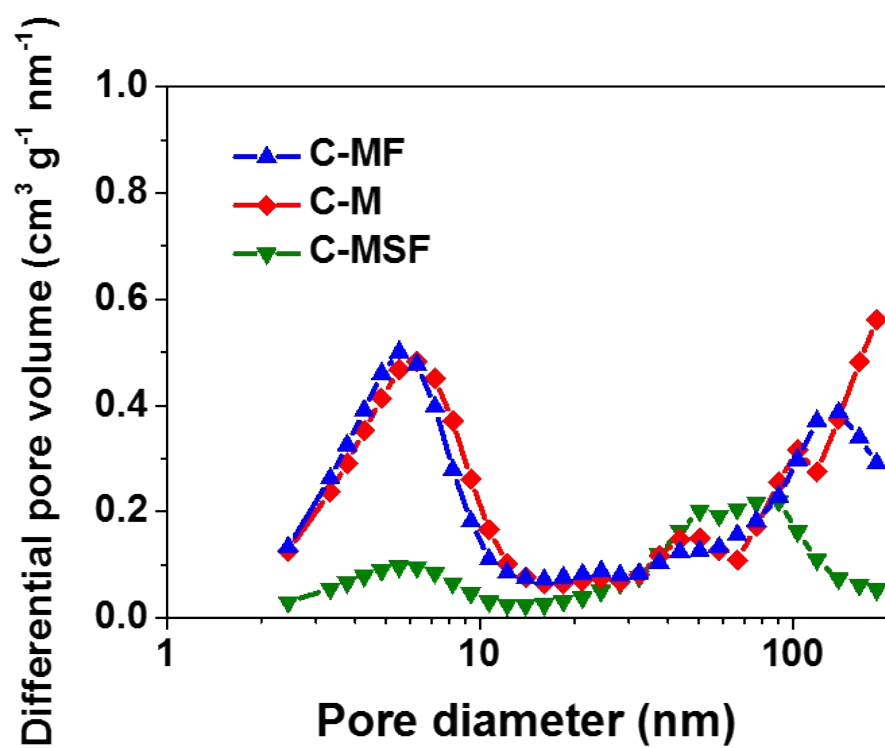

**Figure S6** Pore size distributions of C-MF, C-M, and C-MSF.

**Table S1** ICP quantitative analysis of samples.

| Sample | Mo     | Fe     |
|--------|--------|--------|
| C-MF   | 2808.3 | 1143.7 |
| BC-MF  | 3.71   | 31.51  |

The relative concentration of elements (weight ratio)

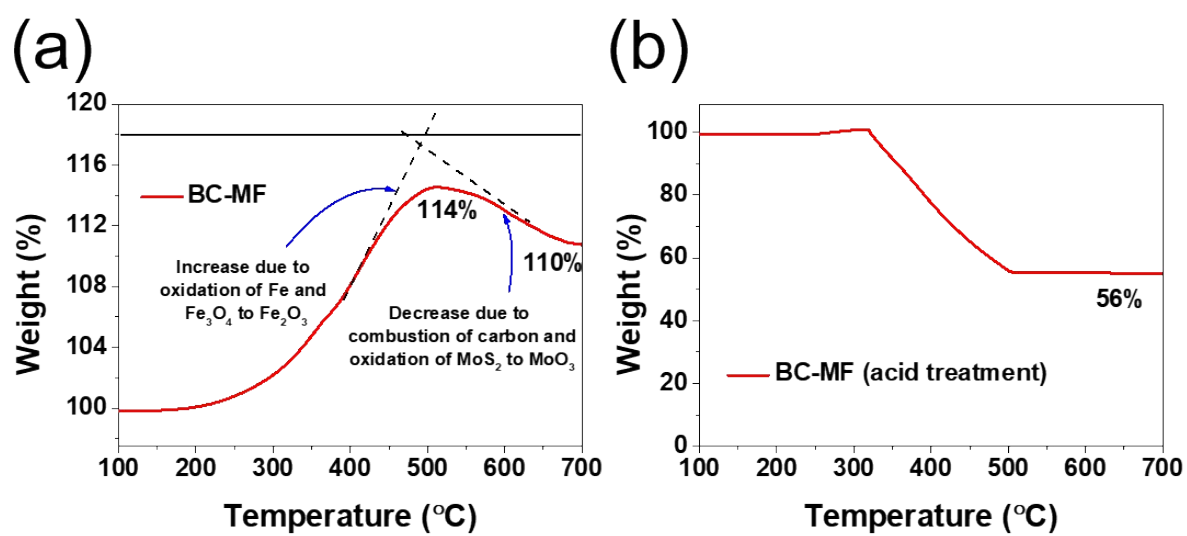

**Figure S7** TGA curves of BC-MF (a) before and (b) after acid treatment.

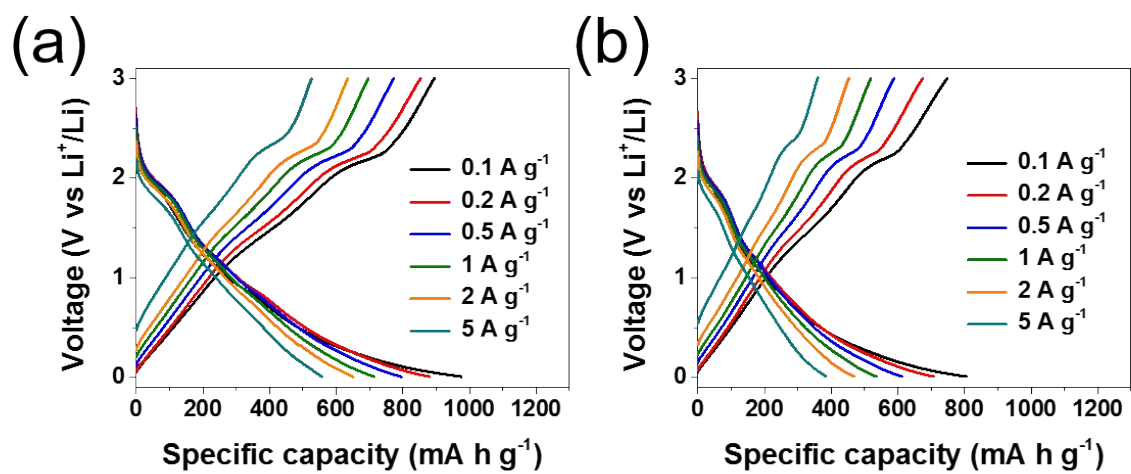

**Figure S8** Galvanostatic discharge/charge profiles of (a) C-MF and (b) C-M at different current density.

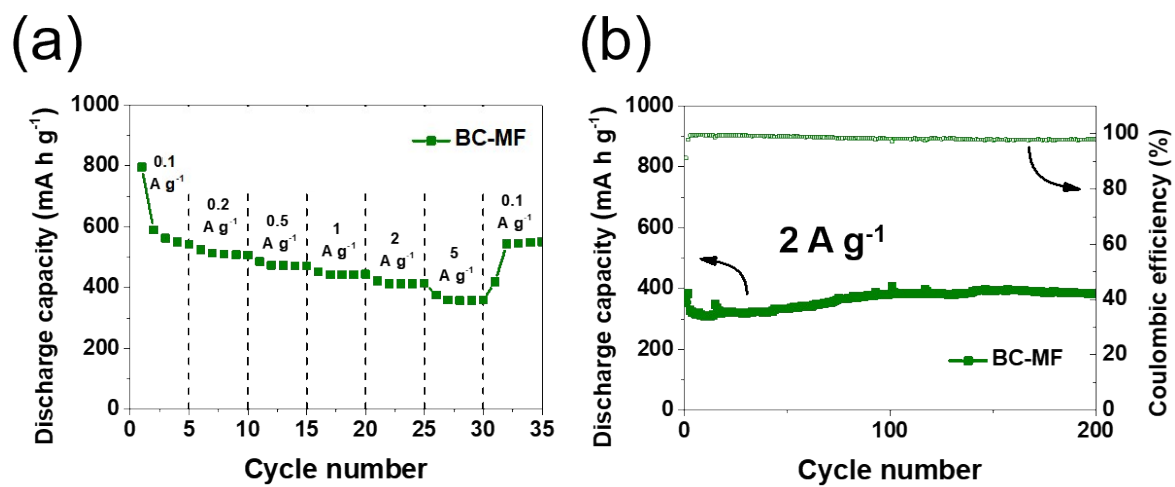

**Figure S9** (a) Rate performance of BC-MF at different current densities. (b) Cycling performance of BC-MF at current density of 2 A g<sup>-1</sup>.

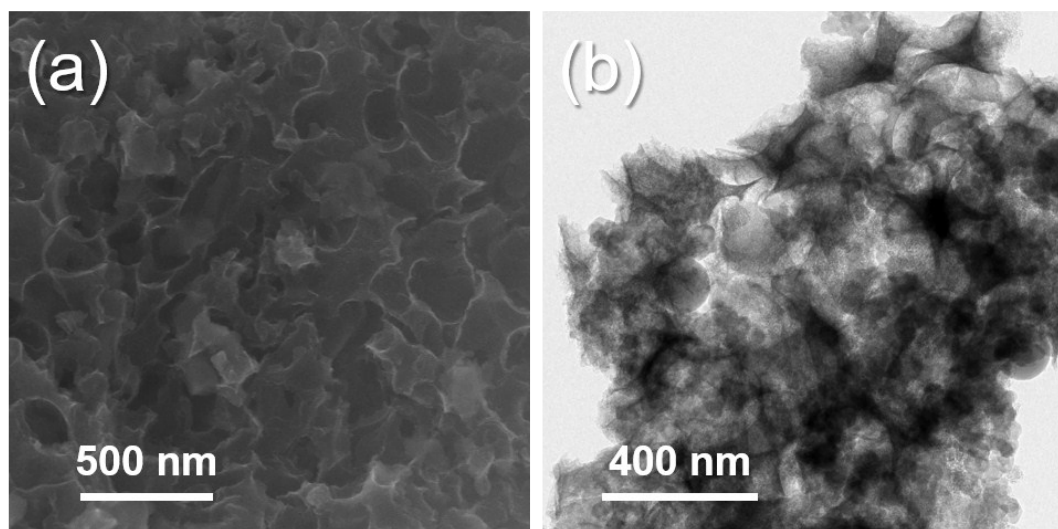

**Figure S10** (a) SEM and (b) TEM images of the C-MF electrode after 100 cycles at  $2 \text{ A g}^{-1}$ .
